# Supplementary material for: Ultra-effective photothermal therapy for prostate cancer cells using dual aptamer-modified gold nanostars
Source: Royal Society of Chemistry journal article supplement (doi:10.1039/c4tb00643g), 2014-01-01
Supplement: c4tb00643g1.pdf [file c4tb00643g1.pdf]

# Electronic Supplementary Information

## **Ultra-Effective Photothermal Therapy for Prostate Cancer cells using Dual Aptamer-Modified Gold Nanostars**

**Hunho Jo,<sup>§</sup> Hyungjun Youn,<sup>§</sup> Seonghwan Lee, and Changill Ban<sup>\*</sup>**

Department of Chemistry, Pohang University of Science and Technology, 77, Cheongam-Ro,  
Nam-Gu, Pohang, Gyeongbuk, 790-784, Korea

*<sup>§</sup>These authors contributed equally to this work.*

*\* Corresponding author:*

*Tel: +82 54 279 2127*

*Fax: +82 54 279 5840*

*E-mail: [ciban@postech.ac.kr](mailto:ciban@postech.ac.kr)*

**Fig. S1.**

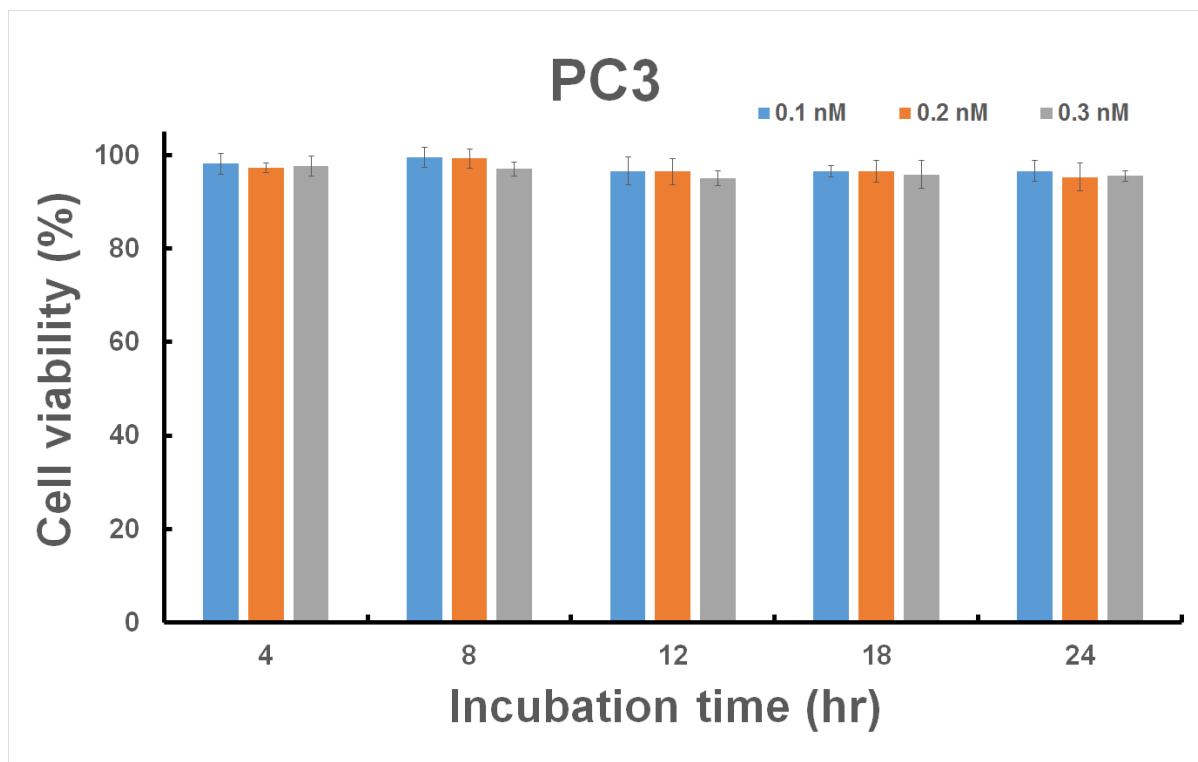

Fig. S1 Cell viability of PC3 cells treated with various concentrations of Dual-AuNS. The viability was measured every 4 h.

**Fig. S2.**

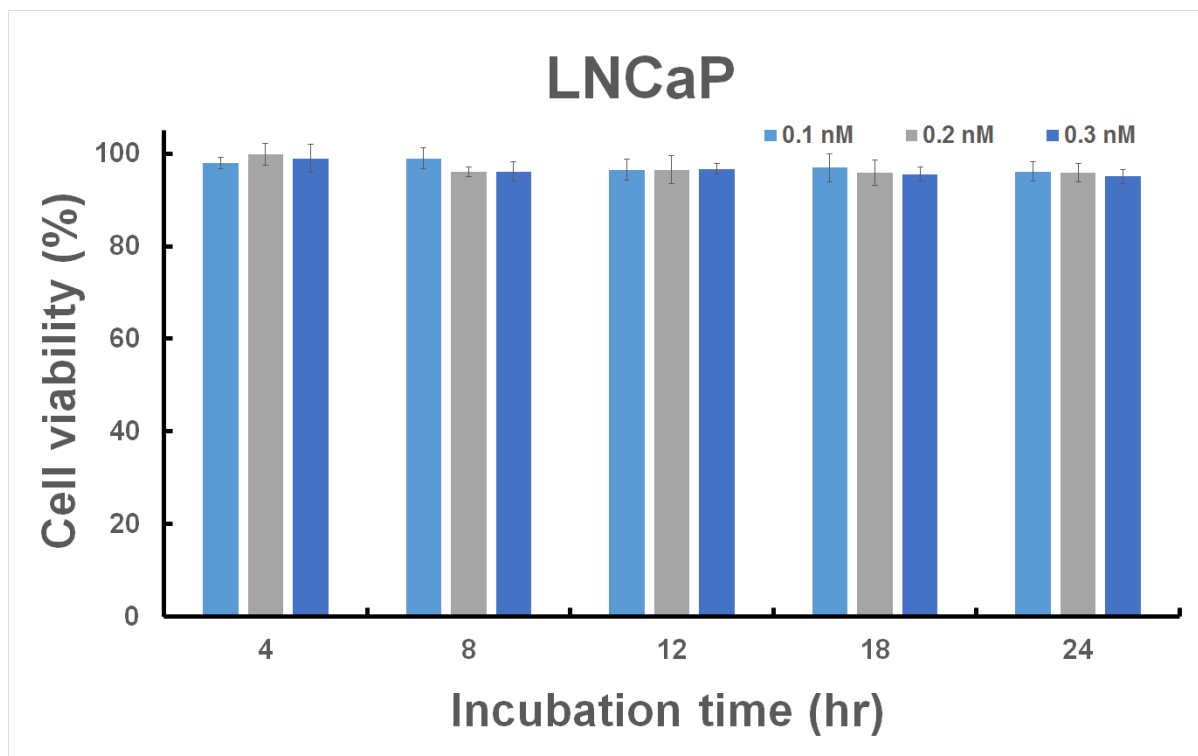

Fig. S2 Cell viability of LNCaP cells treated with various concentrations of Dual-AuNS. The viability was measured every 4 h.

**Fig. S3.**

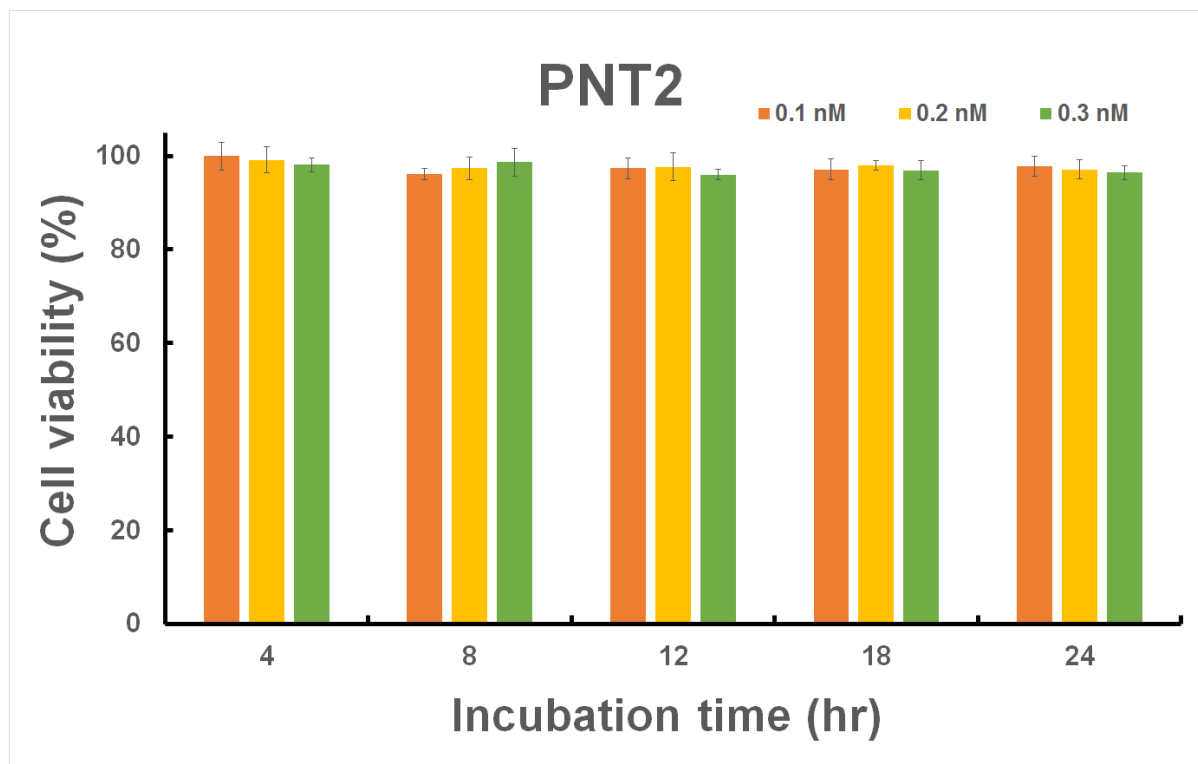

Fig. S3 Cell viability of PNT2 cells treated with various concentrations of Dual-AuNS. The viability was measured every 4 h.

**Fig. S4.**

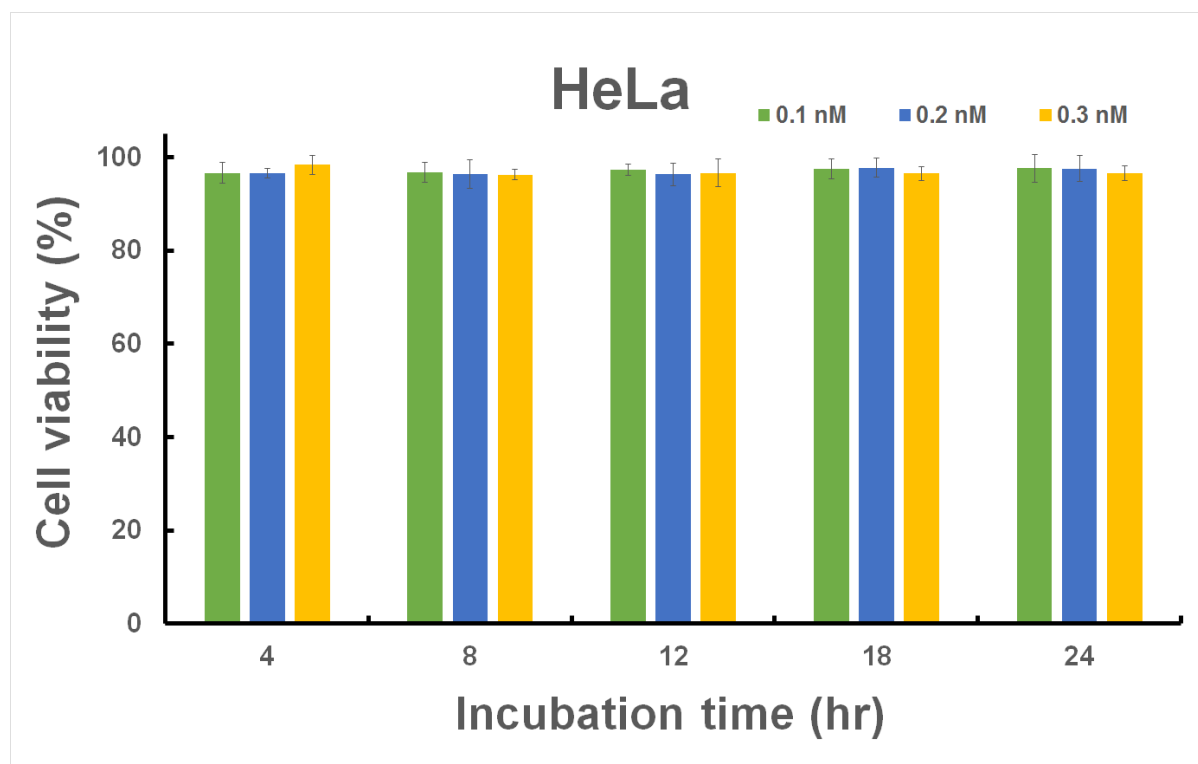

Fig. S4 Cell viability of HeLa cells treated with various concentrations of Dual-AuNS. The viability was measured every 4 h.

Fig. S5.

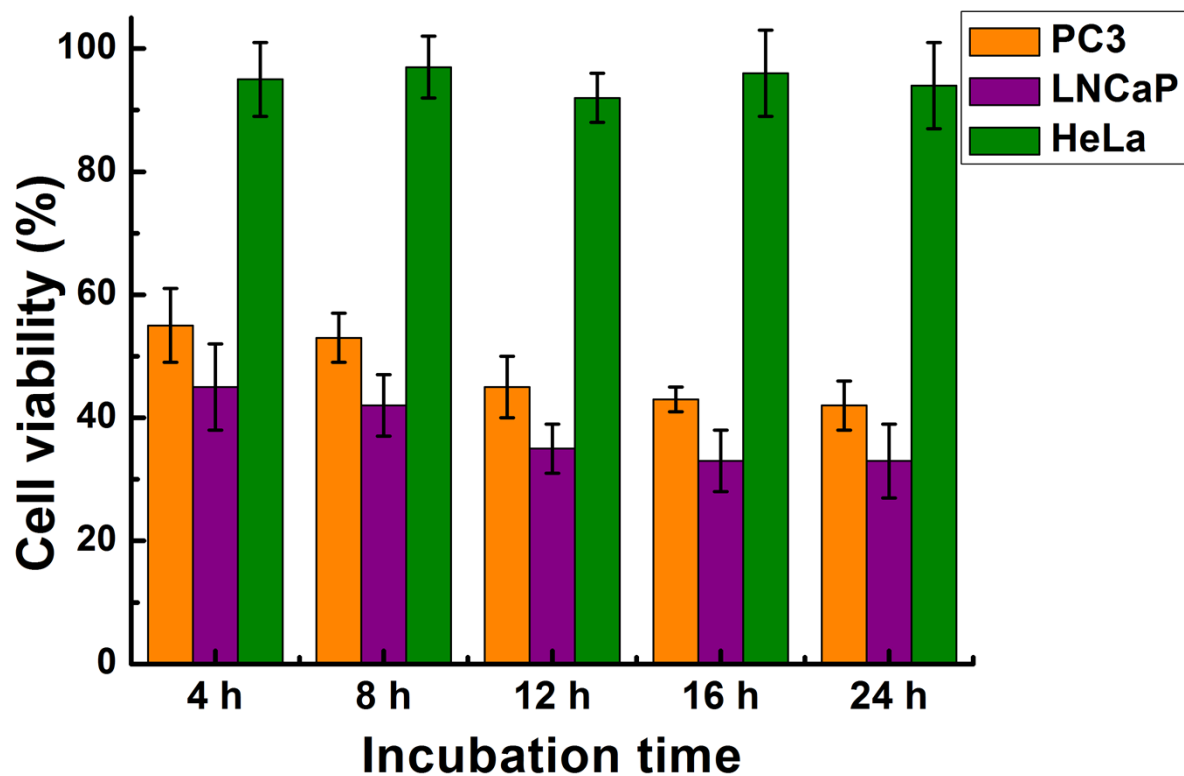

Fig. S5 Optimization of incubation time. Three types of cell lines were incubated with 0.3 nM AuNS for various time and were irradiated using an 808 nm laser for 3 min ( $2 \text{ W/cm}^2$ ). The cell viability was calculated through an MTT assay.
